# Supplementary material for: NANOG/NANOGP8 Localizes at the Centrosome and is Spatiotemporally Associated with Centriole Maturation
Source: MDPI journal article supplement (doi:10.3390/cells9030692), 2020-03-11
Supplement: s1 [file s1]

# **NANOG/NANOGP8 Localizes at the Centrosome and Is Spatiotemporally Associated with Centriole Maturation**

Erika Mikulenкова, Jakub Neradil, Ondrej Vymazal, Jan Skoda and Renata Veselska

## Contents

---

### **Supplementary Figures**

**Figure S1.** Unmerged images from Figure 1b.

**Figure S2.** Unmerged images from Figure 3a.

**Figure S3.** Unmerged images from Figure 3b.

**Figure S4.** Unmerged images from Figure 3c and Figure 4.

**Figure S5.** Western blot images of NANOG immunodetection in three biological replicates of the nuclear and cytoplasmic fractions of RD and NTERA-2 cells.

**Figure S6.** NANOG localization during the cell cycle.

### **Supplementary Tables**

**Table S1.** Validation of anti-NANOG #ab109250 antibody specificity by mass spectrometry of immunoprecipitated NTERA-2 cells.

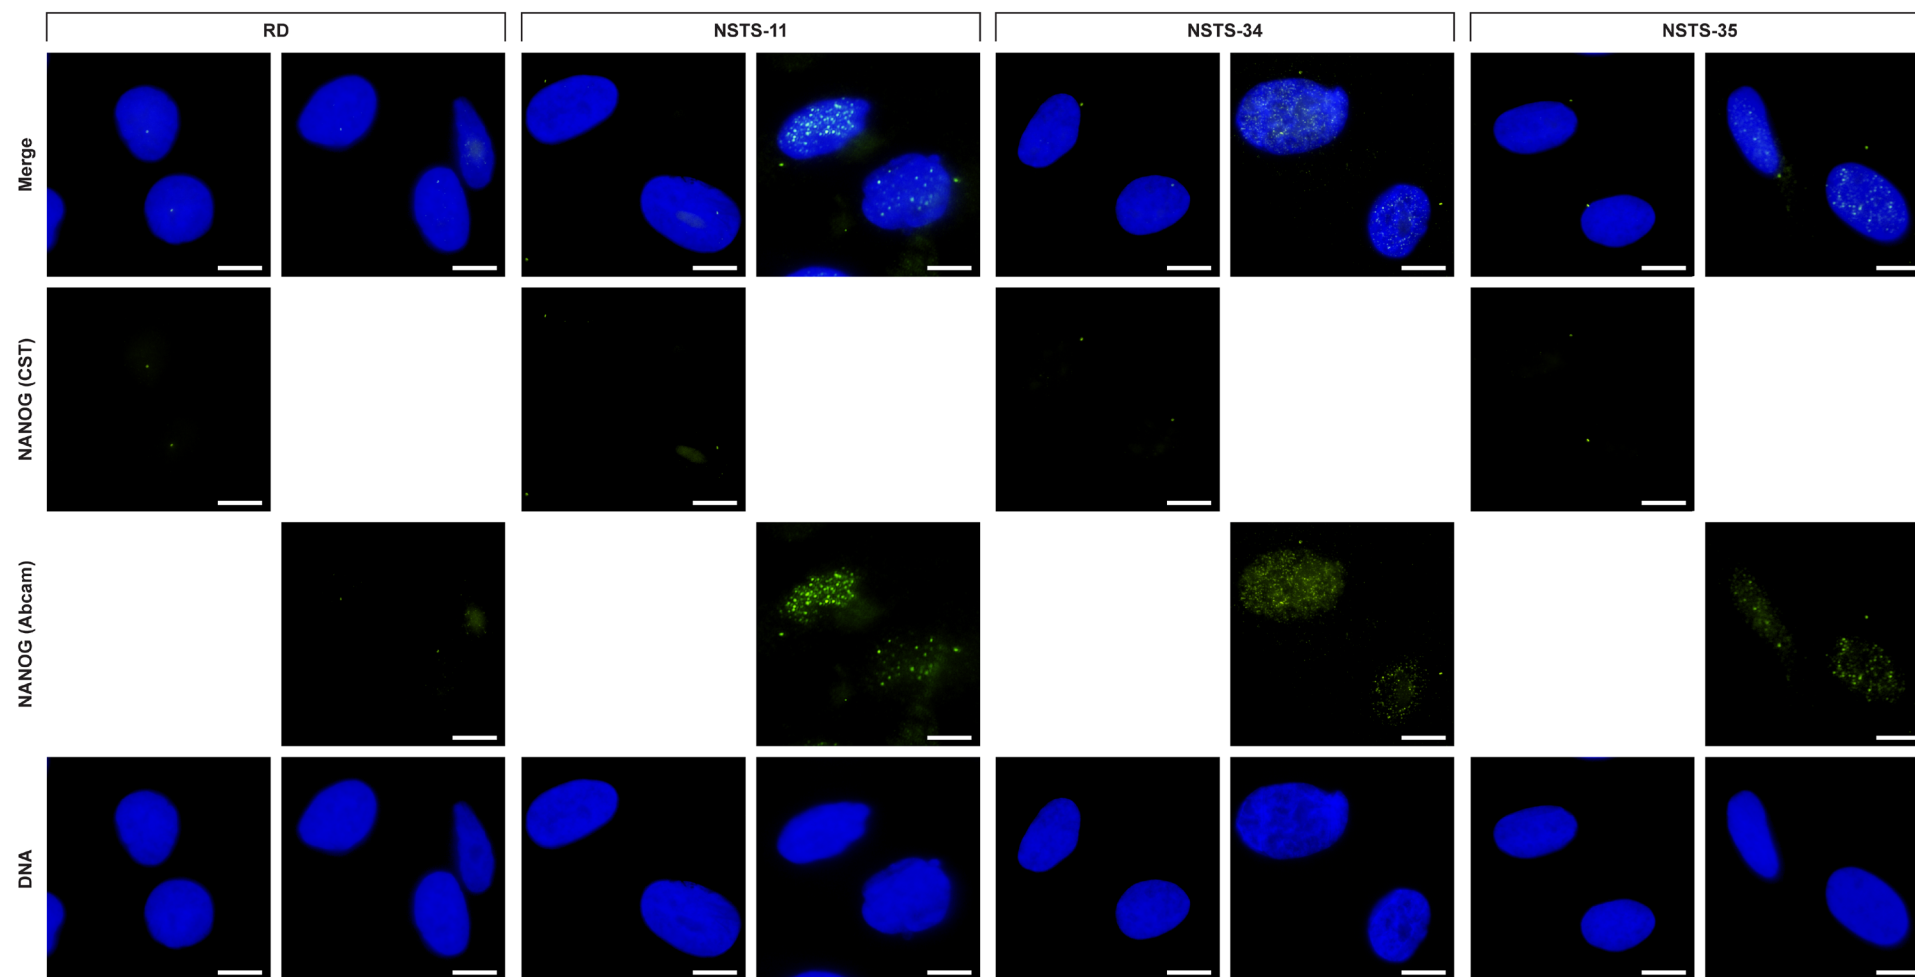

**Figure S1.** Unmerged images from Figure 1b. Localization of NANOG (green) was detected using two anti-NANOG antibodies (#4903, Cell Signaling Technology [CST] and #ab109250, Abcam). The nuclei were counterstained with Hoechst 33342 (blue). Scale bars, 10  $\mu$ m.

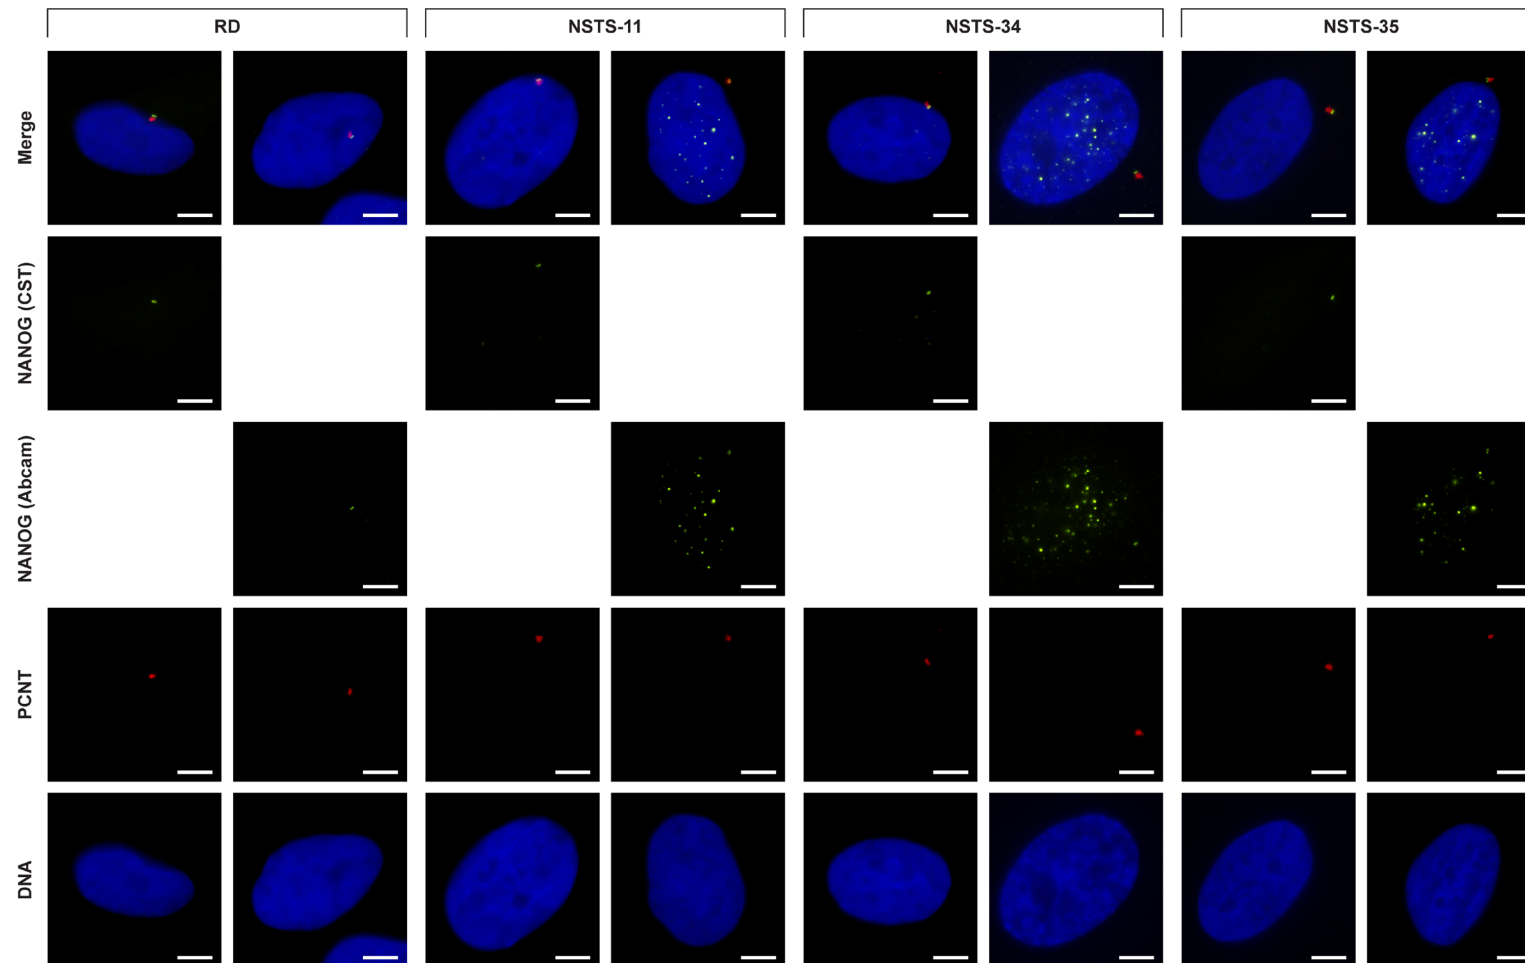

**Figure S2.** Unmerged images from Figure 3a. Localization of NANOG (green) was detected using two anti-NANOG antibodies (#4903, Cell Signaling Technology [CST] and #ab109250, Abcam) and anti-pericentrin antibody (PCNT; red). The nuclei were counterstained with Hoechst 33342 (blue). Scale bars, 5  $\mu$ m.

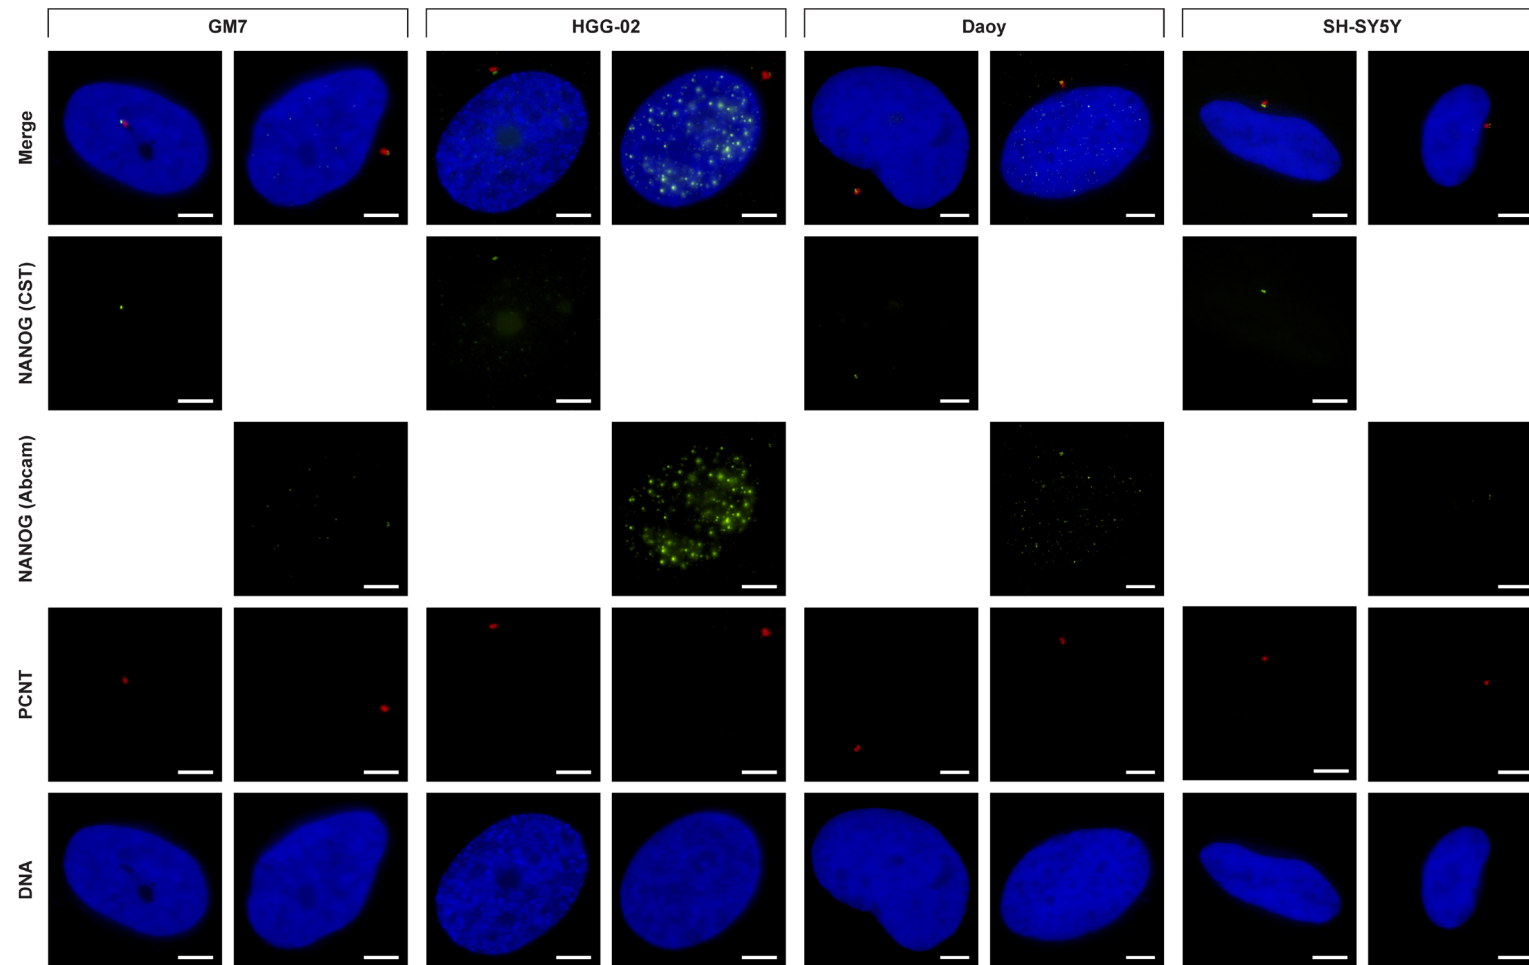

**Figure S3.** Unmerged images from Figure 3b. Localization of NANOG (green) was detected using two anti-NANOG antibodies (#4903, Cell Signaling Technology [CST] and #ab109250, Abcam) and anti-pericentrin antibody (PCNT; red). The nuclei were counterstained with Hoechst 33342 (blue). Scale bars, 5  $\mu$ m.

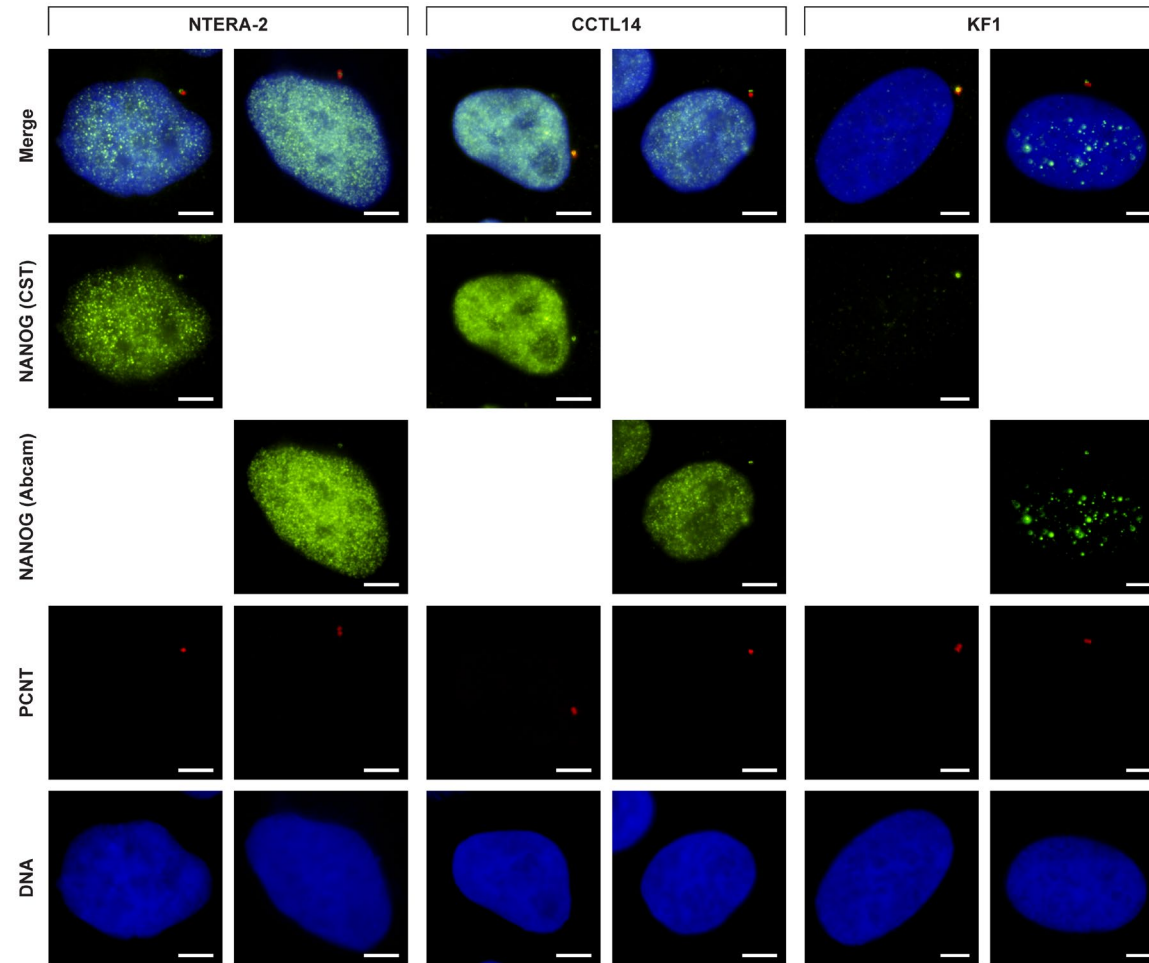

**Figure S4.** Unmerged images from Figure 3c and Figure 4. Localization of NANOG (green) was detected using two anti-NANOG antibodies (#4903, Cell Signaling Technology [CST] and #ab109250, Abcam) and anti-pericentrin antibody (PCNT; red). The nuclei were counterstained with Hoechst 33342 (blue). Scale bars, 5  $\mu$ m.

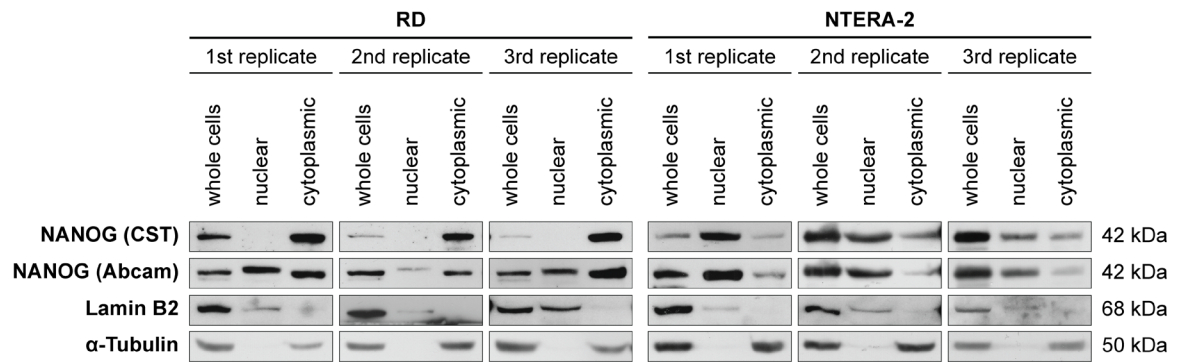

**Figure S5.** Western blot images of NANOG immunodetection in three biological replicates of the nuclear and cytoplasmic fractions of RD and NTERA-2 cells. Nuclear/cytoplasmic fractionation followed by immunoblotting was performed using two independent anti-NANOG commercial antibodies (#4903, Cell Signaling Technology [CST] and #ab109250, Abcam). Lamin B2 and  $\alpha$ -tubulin served as controls of the nuclear fraction and cytoplasmic fraction purity, respectively.

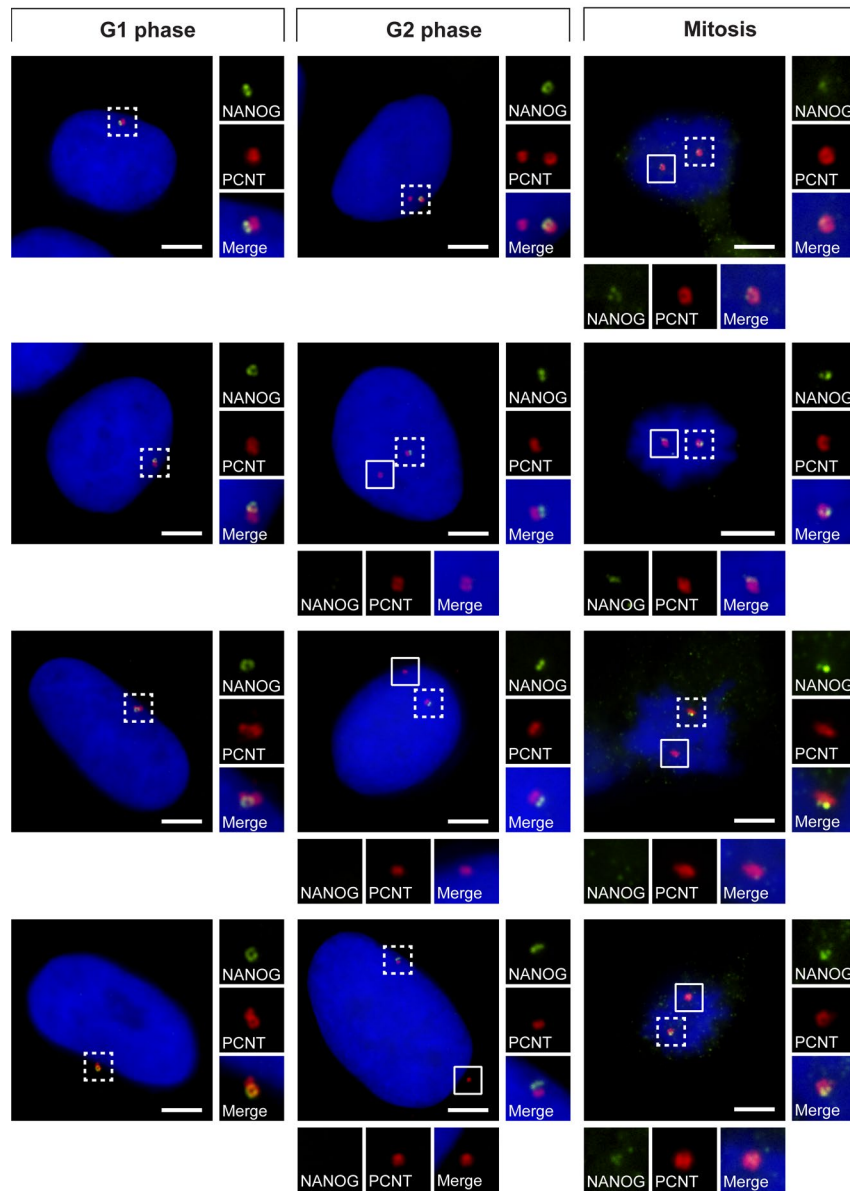

**Figure S6.** NANOG localization during the cell cycle. NANOG (green; #4903, Cell Signaling Technology [CST]) colocalized with one centrosome (pericentrin, PCNT; red) only during G1 and G2 phases but with both centrosomes (pericentrin, PCNT; red) during mitosis. The nuclei were counterstained with Hoechst 33342 (blue). For each image, regions of interest are indicated by the dashed and solid boxes, and the close-ups are provided on the right and below, respectively. Scale bars, 5  $\mu\text{m}$ .

**Table S1.** Validation of anti-NANOG #ab109250 antibody specificity by mass spectrometry of immunoprecipitated NTERA-2 cells.

| Accession | Gene                                                                     | Gene symbol     | Peptides Count | Spectra Count |
|-----------|--------------------------------------------------------------------------|-----------------|----------------|---------------|
| P35580    | Myosin-10                                                                | <i>MYH10</i>    | 45             | 144           |
| Q13813    | Spectrin alpha chain, non-erythrocytic 1                                 | <i>SPTAN1</i>   | 31             | 70            |
| Q01082    | Spectrin beta chain, non-erythrocytic 1                                  | <i>SPTBN1</i>   | 23             | 51            |
| P35579    | Myosin-9                                                                 | <i>MYH9</i>     | 14             | 42            |
| Q16643    | Drebrin                                                                  | <i>DBN1</i>     | 13             | 38            |
| P11142    | Heat shock cognate 71 kDa protein                                        | <i>HSPA8</i>    | 11             | 41            |
| Q8TEW0    | Partitioning defective 3 homolog                                         | <i>PARD3</i>    | 10             | 23            |
| P05787    | Keratin, type II cytoskeletal 8                                          | <i>KRT8</i>     | 9              | 30            |
| P10809    | 60 kDa heat shock protein, mitochondrial                                 | <i>HSPD1</i>    | 8              | 20            |
| P14866    | Heterogeneous nuclear ribonucleoprotein L                                | <i>HNRNPL</i>   | 8              | 43            |
| P25705    | ATP synthase subunit alpha, mitochondrial                                | <i>ATP5F1A</i>  | 8              | 33            |
| Q9UQ35    | Serine/arginine repetitive matrix protein 2                              | <i>SRRM2</i>    | 8              | 12            |
| O15164    | Transcription intermediary factor 1-alpha                                | <i>TRIM24</i>   | 7              | 30            |
| P05783    | Keratin, type I cytoskeletal 18                                          | <i>KRT18</i>    | 7              | 26            |
| O00264    | Membrane-associated progesterone receptor component 1                    | <i>PGRMC1</i>   | 5              | 13            |
| P04843    | Dolichyl-diphosphooligosaccharide--protein glycosyltransferase subunit 1 | <i>RPN1</i>     | 5              | 11            |
| P11021    | Endoplasmic reticulum chaperone BiP                                      | <i>HSPA5</i>    | 5              | 7             |
| P60660    | Myosin light polypeptide 6                                               | <i>MYL6</i>     | 5              | 18            |
| P78527    | DNA-dependent protein kinase catalytic subunit                           | <i>PRKDC</i>    | 5              | 8             |
| Q00839    | Heterogeneous nuclear ribonucleoprotein U                                | <i>HNRNPU</i>   | 5              | 8             |
| Q07157    | Tight junction protein ZO-1                                              | <i>TJP1</i>     | 5              | 9             |
| Q92734    | Protein TFG                                                              | <i>TFG</i>      | 5              | 22            |
| P01870    | Ig gamma chain C region                                                  |                 | 4              | 23            |
| P04406    | Glyceraldehyde-3-phosphate dehydrogenase                                 | <i>GAPDH</i>    | 4              | 16            |
| P08670    | Vimentin                                                                 | <i>VIM</i>      | 4              | 8             |
| P09493    | Tropomyosin alpha-1 chain                                                | <i>TPM1</i>     | 4              | 28            |
| P35221    | Catenin alpha-1                                                          | <i>CTNNA1</i>   | 4              | 5             |
| P43243    | Matrin-3                                                                 | <i>MATR3</i>    | 4              | 5             |
| P61978    | Heterogeneous nuclear ribonucleoprotein K                                | <i>HNRNPK</i>   | 4              | 8             |
| P62805    | Histone H4                                                               | <i>HIST1H4A</i> | 4              | 32            |
| Q9H444    | Charged multivesicular body protein 4b                                   | <i>CHMP4B</i>   | 4              | 14            |



| Accession     | Gene                                                                          | Gene symbol    | Peptides Count | Spectra Count |
|---------------|-------------------------------------------------------------------------------|----------------|----------------|---------------|
| Q9NYL9        | Tropomodulin-3                                                                | <i>TMOD3</i>   | 4              | 5             |
| P05023        | Sodium/potassium-transporting ATPase subunit alpha-1                          | <i>ATP1A1</i>  | 3              | 5             |
| P23396        | 40S ribosomal protein S3                                                      | <i>RPS3</i>    | 3              | 9             |
| P35613        | Basigin                                                                       | <i>BSG</i>     | 3              | 12            |
| P46779        | 60S ribosomal protein L28                                                     | <i>RPL28</i>   | 3              | 5             |
| P49411        | Elongation factor Tu, mitochondrial                                           | <i>TUFM</i>    | 3              | 7             |
| P52272        | Heterogeneous nuclear ribonucleoprotein M                                     | <i>HNRNPM</i>  | 3              | 7             |
| P56747        | Claudin-6                                                                     | <i>CLDN6</i>   | 3              | 10            |
| Q07020        | 60S ribosomal protein L18                                                     | <i>RPL18</i>   | 3              | 9             |
| Q07955        | Serine/arginine-rich splicing factor 1                                        | <i>SRSF1</i>   | 3              | 5             |
| Q15393        | Splicing factor 3B subunit 3                                                  | <i>SF3B3</i>   | 3              | 4             |
| Q16629        | Serine/arginine-rich splicing factor 7                                        | <i>SRSF7</i>   | 3              | 13            |
| Q2KHR3        | Glutamine and serine-rich protein 1                                           | <i>QSER1</i>   | 3              | 6             |
| Q5PRF9        | Protein Smaug homolog 2                                                       | <i>SAMD4B</i>  | 3              | 4             |
| <b>Q6NSW7</b> | <b>Homeobox protein NANOGP8</b>                                               | <b>NANOGP8</b> | 3              | 6             |
|               | GKQPTSAENSVAK (NANOGP8)                                                       |                |                |               |
|               | QPTSAENSVAK (NANOGP8)                                                         |                |                |               |
|               | TVFSSTQLCVLNDR (NANOG, NANOGP1 and NANOGP8)                                   |                |                |               |
| O75569        | Interferon-inducible double-stranded RNA-dependent protein kinase activator A | <i>PRKRA</i>   | 2              | 3             |
| P04792        | Heat shock protein beta-1                                                     | <i>HSPB1</i>   | 2              | 8             |
| P06753        | Tropomyosin alpha-3 chain                                                     | <i>TPM3</i>    | 2              | 11            |
| P09496        | Clathrin light chain A                                                        | <i>CLTA</i>    | 2              | 4             |
| P17302        | Gap junction alpha-1 protein                                                  | <i>GJA1</i>    | 2              | 8             |
| P35232        | Prohibitin                                                                    | <i>PHB</i>     | 2              | 3             |
| P36578        | 60S ribosomal protein L4                                                      | <i>RPL4</i>    | 2              | 5             |
| P46776        | 60S ribosomal protein L27a                                                    | <i>RPL27A</i>  | 2              | 7             |
| P46782        | 40S ribosomal protein S5                                                      | <i>RPS5</i>    | 2              | 5             |
| P63244        | Receptor of activated protein C kinase 1                                      | <i>RACK1</i>   | 2              | 3             |
| P78310        | Coxsackievirus and adenovirus receptor                                        | <i>CXADR</i>   | 2              | 8             |
| Q00796        | Sorbitol dehydrogenase                                                        | <i>SORD</i>    | 2              | 8             |
| Q14257        | Reticulocalbin-2                                                              | <i>RCN2</i>    | 2              | 5             |
| Q15392        | Delta(24)-sterol reductase                                                    | <i>DHCR24</i>  | 2              | 12            |
| Q9BWH2        | FUN14 domain-containing protein 2                                             | <i>FUNDC2</i>  | 2              | 6             |
